# Supplementary material for: Psychoeducation for Inpatients With First-Episode Psychosis: Results From a Survey of Psychiatry Trainees in New York City
Source: Atypon-hosted journal article supplement (doi:10.1176/appi.ps.201900633), 2021-03-11
Supplement: appi.ps.201900633.ds001.pdf [file appi.ps.201900633.ds001.pdf]

Survey respondents (N=162) by state and institution

| <b>State</b>                                                    | <b># Respondents</b> | <b>% Respondents</b> |
|-----------------------------------------------------------------|----------------------|----------------------|
| <b>CA</b>                                                       | <b>10</b>            | <b>6</b>             |
| Arrowhead Regional Medical Center                               | 1                    | 1                    |
| Loma Linda University Health Education Consortium               | 1                    | 1                    |
| University of California San Diego Medical Center               | 8                    | 5                    |
| <b>FL</b>                                                       | <b>6</b>             | <b>4</b>             |
| Jackson Memorial Hospital/Jackson Health System Program         | 3                    | 2                    |
| Life Management of NW Florida                                   | 1                    | 1                    |
| University of Florida College of Medicine Jacksonville          | 2                    | 1                    |
| <b>GA</b>                                                       | <b>7</b>             | <b>4</b>             |
| Emory University School of Medicine                             | 7                    | 4                    |
| <b>IL</b>                                                       | <b>8</b>             | <b>5</b>             |
| Loyola University Medical Center                                | 2                    | 1                    |
| University of Chicago                                           | 5                    | 3                    |
| University of Illinois College of Medicine at Chicago           | 1                    | 1                    |
| <b>KY</b>                                                       | <b>1</b>             | <b>1</b>             |
| University of Kentucky College of Medicine                      | 1                    | 1                    |
| <b>MD</b>                                                       | <b>1</b>             | <b>1</b>             |
| National Capital Consortium                                     | 1                    | 1                    |
| <b>MI</b>                                                       | <b>14</b>            | <b>9</b>             |
| Michigan State University                                       | 2                    | 1                    |
| University of Michigan Hospitals and Health Centers             | 7                    | 4                    |
| Western Michigan University Homer Stryker MD School of Medicine | 5                    | 3                    |
| <b>MO</b>                                                       | <b>2</b>             | <b>1</b>             |
| Kansas City University of Medicine & Biosciences-GME Consortium | 2                    | 1                    |
| <b>NH</b>                                                       | <b>4</b>             | <b>3</b>             |
| Mary Hitchcock Memorial Hospital                                | 4                    | 3                    |
| <b>NJ</b>                                                       | <b>2</b>             | <b>1</b>             |
| New Bridge Medical Center                                       | 2                    | 1                    |
| <b>NV</b>                                                       | <b>1</b>             | <b>1</b>             |
| University of Nevada Reno School of Medicine (Las Vegas)        | 1                    | 1                    |
| <b>NY</b>                                                       | <b>70</b>            | <b>43</b>            |
| Albany Medical Center                                           | 4                    | 3                    |
| BestSelf Behavioral Health                                      | 1                    | 1                    |
| Icahn School of Medicine at Mount Sinai                         | 9                    | 6                    |

|                                                                     |           |          |
|---------------------------------------------------------------------|-----------|----------|
| Maimonides Medical Center                                           | 1         | 1        |
| Montefiore Medical Center/Albert Einstein College of Medicine       | 8         | 5        |
| New York Medical College at Metropolitan Hospital                   | 6         | 4        |
| New York Presbyterian Hospital (Columbia Campus)                    | 10        | 6        |
| New York Presbyterian Hospital (Cornell Campus)                     | 1         | 1        |
| St Barnabas Hospital                                                | 1         | 1        |
| Zucker School of Medicine at Hofstra/Northwell                      | 29        | 18       |
| <b>OK</b>                                                           | <b>2</b>  | <b>1</b> |
| Oklahoma State University Center for Health Sciences                | 2         | 1        |
| <b>OR</b>                                                           | <b>3</b>  | <b>2</b> |
| Oregon Health & Science University                                  | 3         | 2        |
| <b>PA</b>                                                           | <b>10</b> | <b>6</b> |
| Drexel University College of Medicine/Hahnemann University Hospital | 1         | 1        |
| University of Pittsburgh                                            | 9         | 6        |
| <b>TN</b>                                                           | <b>2</b>  | <b>1</b> |
| University of Tennessee                                             | 2         | 1        |
| <b>TX</b>                                                           | <b>9</b>  | <b>6</b> |
| Baylor College of Medicine                                          | 6         | 4        |
| University of Texas RGV                                             | 3         | 2        |
| <b>VA</b>                                                           | <b>4</b>  | <b>3</b> |
| Eastern Virginia Medical School                                     | 2         | 1        |
| University of Virginia Medical Center                               | 1         | 1        |
| Virginia Commonwealth University Health System                      | 1         | 1        |
| <b>VT</b>                                                           | <b>4</b>  | <b>3</b> |
| University of Vermont Medical Center                                | 4         | 3        |
| <b>WI</b>                                                           | <b>2</b>  | <b>1</b> |
| University of Wisconsin Hospitals and Clinics                       | 2         | 1        |

Characterization of psychoeducation provided to patients with FEP and their families during inpatient hospitalization.

|                                      | Number of respondents<br>(NYC trainees, N=59) –<br>patient psychoeducation |    | Number of respondents<br>(NYC trainees, N=58) –<br>family psychoeducation |     | Number of respondents<br>(national sample, N=153) –<br>patient psychoeducation |    | Number of respondents<br>(national sample, N=152) –<br>family psychoeducation |     |
|--------------------------------------|----------------------------------------------------------------------------|----|---------------------------------------------------------------------------|-----|--------------------------------------------------------------------------------|----|-------------------------------------------------------------------------------|-----|
|                                      | N                                                                          | %  | N                                                                         | %   | N                                                                              | %  | N                                                                             | %   |
| Individual or group session          |                                                                            |    |                                                                           |     |                                                                                |    |                                                                               |     |
| Individual                           | 57                                                                         | 97 | 50                                                                        | 86  | 147                                                                            | 96 | 125                                                                           | 82  |
| Group                                | 2                                                                          | 3  | 8                                                                         | 14  | 6                                                                              | 4  | 27                                                                            | 18  |
| Approximate number of<br>sessions    |                                                                            |    |                                                                           |     |                                                                                |    |                                                                               |     |
| One                                  | 3                                                                          | 5  | 26                                                                        | 45  | 34                                                                             | 22 | 85                                                                            | 56  |
| Two                                  | 25                                                                         | 42 | 25                                                                        | 43  | 58                                                                             | 38 | 46                                                                            | 30  |
| Three                                | 18                                                                         | 31 | 3                                                                         | 5   | 38                                                                             | 25 | 12                                                                            | 8   |
| Four or more                         | 13                                                                         | 22 | 4                                                                         | 7   | 23                                                                             | 15 | 9                                                                             | 6   |
| Duration of a single session         |                                                                            |    |                                                                           |     |                                                                                |    |                                                                               |     |
| < 15 minutes                         | 25                                                                         | 42 | 13                                                                        | 22  | 70                                                                             | 46 | 46                                                                            | 31  |
| 15 – 30 minutes                      | 30                                                                         | 51 | 34                                                                        | 59  | 75                                                                             | 49 | 85                                                                            | 56  |
| > 30 minutes                         | 4                                                                          | 7  | 10                                                                        | 17  | 8                                                                              | 5  | 20                                                                            | 13  |
| Content of psychoeducation           |                                                                            |    |                                                                           |     |                                                                                |    |                                                                               |     |
| Diagnosis                            | 58                                                                         | 98 | 58                                                                        | 100 | 150                                                                            | 98 | 152                                                                           | 100 |
| Etiology of illness                  | 39                                                                         | 66 | 46                                                                        | 79  | 109                                                                            | 71 | 122                                                                           | 80  |
| Prevalence                           | 22                                                                         | 37 | 27                                                                        | 47  | 41                                                                             | 27 | 59                                                                            | 39  |
| Prognosis                            | 53                                                                         | 90 | 54                                                                        | 93  | 128                                                                            | 84 | 139                                                                           | 91  |
| Treatment options                    | 56                                                                         | 95 | 56                                                                        | 97  | 146                                                                            | 95 | 149                                                                           | 98  |
| Medication side effects              | 57                                                                         | 97 | 52                                                                        | 90  | 149                                                                            | 97 | 139                                                                           | 91  |
| Relapse prevention                   | 48                                                                         | 81 | 50                                                                        | 86  | 128                                                                            | 84 | 130                                                                           | 86  |
| Warning signs of relapse             | 45                                                                         | 76 | 50                                                                        | 86  | 106                                                                            | 69 | 128                                                                           | 84  |
| Potential impact of substance<br>use | 52                                                                         | 88 | 46                                                                        | 79  | 130                                                                            | 85 | 131                                                                           | 86  |
| Emotional impact of illness          | 28                                                                         | 47 | 35                                                                        | 60  | 76                                                                             | 50 | 93                                                                            | 61  |
| Coping skills                        | 41                                                                         | 69 | 33                                                                        | 57  | 104                                                                            | 68 | 82                                                                            | 54  |
